# Supplementary material for: Exploring natural genetic diversity in a bread wheat multi-founder population: dual imaging of photosynthesis and stomatal kinetics
Source: PubMed Central journal article supplement (PMC11565207; doi:10.1093/jxb/erae233), 2024-05-25
Supplement: erae233_suppl_supplementary_figure_s1.pdf [file erae233_suppl_supplementary_figure_s1.pdf]

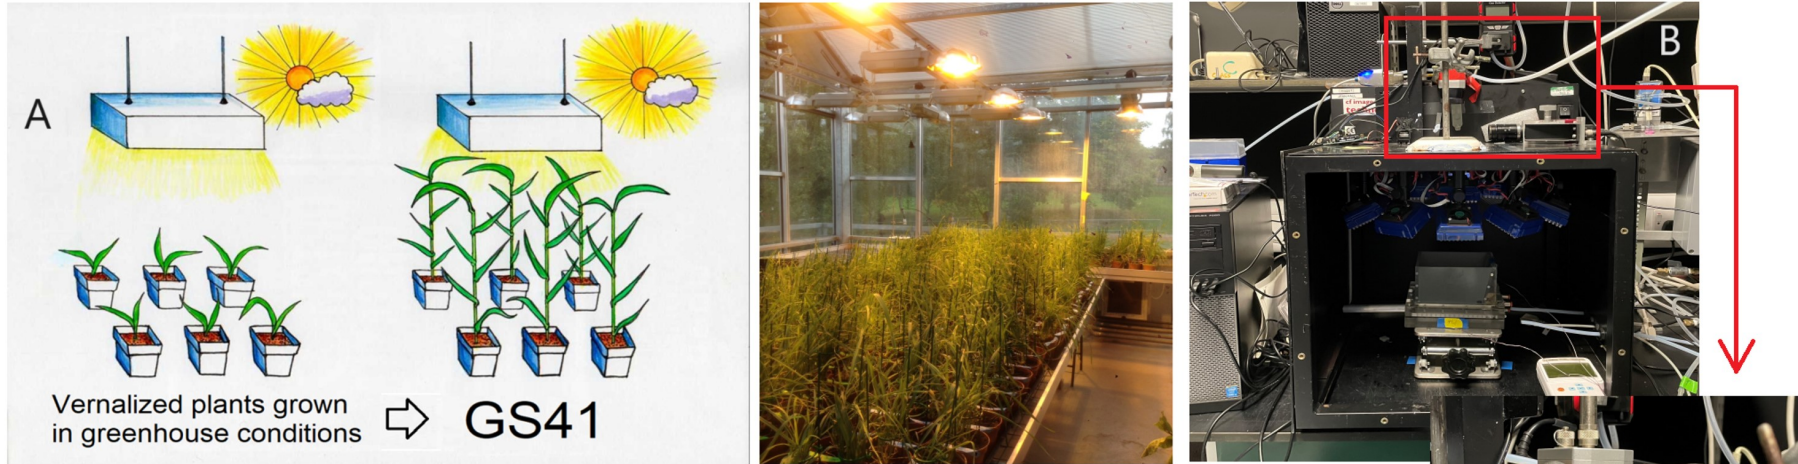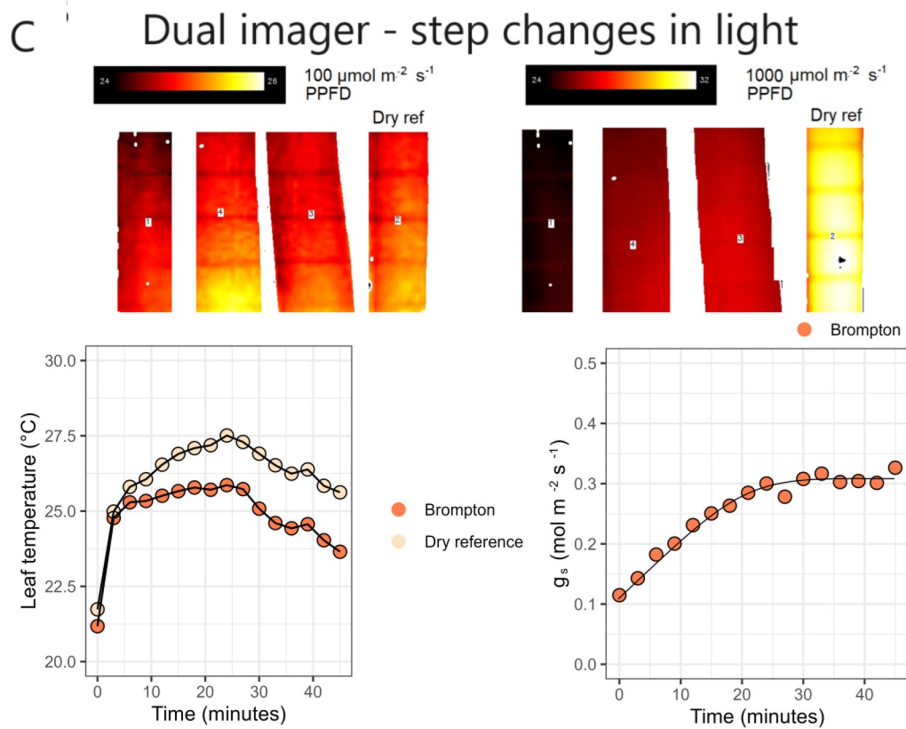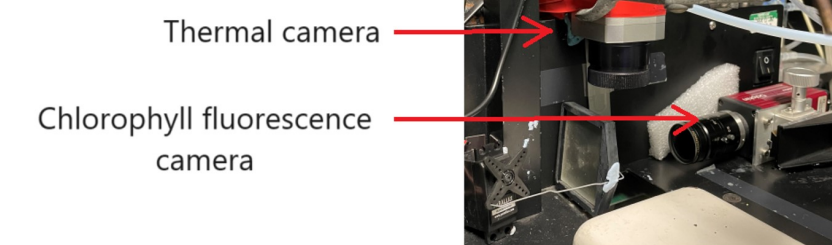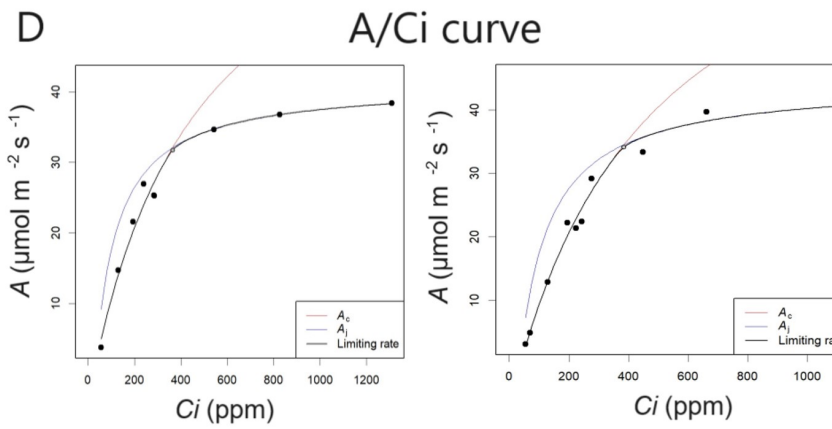

Supplementary Figure 1. A) Visualization of the pipeline for plant growth including vernalization and subsequent greenhouse growth. B) Dual imager set-up including thermal and chlorophyll fluorescence cameras as well as the cuvette within the system used for leaf screening. C) Example of thermal images and spatial variation assessed including leaf (cv. Soissons) and dry reference with relative example of temperature and  $g_s$  dynamics evaluated. D) Example of contrasting  $A/C_i$  curves and relative standard output.  $A_n$  is the net photosynthetic rate,  $C_i$  the intercellular  $\text{CO}_2$  concentration. Symbols are measurements, the black line the fitted model. Coloured lines indicate the two photosynthesis rates for  $V_{c_{max}}$  and  $J_{max}$  estimation,
